# Supplementary material for: Data assimilation for volcanic ash plumes using a satellite observational operator: a case study on the 2010 Eyjafjallajökull volcanic eruption
Source: Copernicus journal article supplement (doi:10.5194/acp-17-1187-2017), 2017-01-25
Supplement: Supplementary file 1 [file acp-17-1187-2017-supplement.zip]

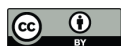

*Supplement of*

## **Data assimilation for volcanic ash plumes using a satellite observational operator: a case study on the 2010 Eyjafjallajökull volcanic eruption**

**Guangliang Fu et al.**

*Correspondence to:* Guangliang Fu (g.fu@tudelft.nl)

- [acp-17-1187-2017-supplement-title-page.pdf](#)
- [20100518\\_pm\\_pos\\_weber.xlsx](#)

The copyright of individual parts of the supplement might differ from the CC-BY 3.0 licence.
